# Supplementary material for: Estrogen-Dependent Upregulation of Adcyap1r1 Expression in Nucleus Accumbens Is Associated With Genetic Predisposition of Sex-Specific QTL for Alcohol Consumption on Rat Chromosome 4
Source: PubMed Central journal article supplement (PMC6288178; doi:10.3389/fgene.2018.00513), 2018-12-04
Supplement: Table_1.pdf [file Table_1.pdf]

| <b>Sample</b>          | <b>iP-F2</b> | <b>iP-F5</b> | <b>iP-F6</b> | <b>ISCS-B-F9</b> | <b>ISCS-B-F10</b> | <b>ISCS-B-F11</b> |
|------------------------|--------------|--------------|--------------|------------------|-------------------|-------------------|
| Filtered paired reads  | 29,973,030   | 34,661,705   | 44,114,178   | 49,441,621       | 48,486,251        | 46,258,263        |
| Left mapped reads      | 29,971,923   | 34,660,505   | 44,112,528   | 49,439,481       | 48,484,493        | 46,258,263        |
| Left mapped reads (%)  | 100%         | 100%         | 100%         | 100%             | 100%              | 100%              |
| Right mapped reads     | 29,947,938   | 34,633,262   | 44,085,777   | 49,400,296       | 48,454,937        | 46,228,550        |
| Right mapped reads (%) | 99.92%       | 99.92%       | 99.94%       | 99.92%           | 99.94%            | 99.94%            |

Supplementary Table S1. RNA-seq reads of each sample.

**Female**

| Gene Symbol      | ISCS9 (mean) | Variance | iP (mean) | Variance | Fold change: |                    |
|------------------|--------------|----------|-----------|----------|--------------|--------------------|
|                  |              |          |           |          | ISCSB/iP     | p-value (one-tail) |
| <i>Adcyap1r1</i> | 1.927        | 0.063    | 1.495     | 0.238    | 1.289        | 0.001              |
| <i>Adcy7</i>     | 0.54         | 0.01     | 0.57      | 0.01     | 0.946        | 0.183              |
| <i>Slc5a7</i>    | 1.06         | 0.18     | 1.24      | 0.15     | 0.851        | 0.092              |
| <i>Tacr1</i>     | 1.278        | 0.218    | 1.516     | 0.116    | 0.843        | 0.046              |
| <i>Slc18a3</i>   | 0.906        | 0.108    | 1.262     | 0.277    | 0.718        | 0.011              |
| <i>lhx8</i>      | 2.15         | 1.07     | 3.16      | 1.19     | 0.681        | 0.004              |
| <i>Chat</i>      | 2.26         | 1.01     | 3.52      | 2.61     | 0.642        | 0.004              |
| <i>Ngfr</i>      | 0.268        | 0.009    | 0.438     | 0.046    | 0.611        | 0.003              |
| <i>Nap1L5</i>    | 1.27         | 0.02     | 1.01      | 0.03     | 1.252        | 0.000              |
| <i>Snca</i>      | 1.78         | 0.13     | 1.09      | 0.03     | 1.631        | 0.000              |
| <i>Ppm1K</i>     | 1.45         | 0.01     | 1.04      | 0.02     | 1.393        | 0.000              |
| <i>Aqp1</i>      | 0.85         | 0.29     | 1.25      | 0.64     | 0.681        | 0.044              |

**Male**

|                  | ISCS9 (mean) | Variance | iP (mean) | Variance | ld change: ISCSB, | p-value (one-tail) |
|------------------|--------------|----------|-----------|----------|-------------------|--------------------|
| <i>Adcyap1r1</i> | 1.863        | 0.071    | 1.980     | 0.213    | 0.941             | 0.199              |
| <i>Adcy7</i>     | 0.557        | 0.013    | 0.734     | 0.057    | 0.759             | 0.009              |
| <i>Slc5a7</i>    | 1.165        | 0.446    | 3.408     | 6.201    | 0.342             | 0.002              |
| <i>Tacr1</i>     | 1.214        | 0.197    | 2.515     | 0.905    | 0.483             | 0.000              |
| <i>Slc18a3</i>   | 1.083        | 0.377    | 1.988     | 1.641    | 0.545             | 0.011              |
| <i>Lhx8</i>      | 2.74         | 4.05     | 7.69      | 29.62    | 0.355             | 0.002              |
| <i>Chat</i>      | 2.97         | 3.10     | 7.29      | 26.03    | 0.407             | 0.004              |
| <i>Ngfr</i>      | 0.25         | 0.01     | 1.11      | 1.32     | 0.227             | 0.006              |
| <i>Nap1L5</i>    | 1.01         | 0.06     | 1.05      | 0.12     | 0.965             | 0.356              |
| <i>Snca</i>      | 1.31         | 0.03     | 1.04      | 0.07     | 1.263             | 0.001              |
| <i>PpmiK</i>     | 1.47         | 0.03     | 1.08      | 0.12     | 1.371             | 0.000              |
| <i>Aqp1</i>      | 2.38         | 3.79     | 1.33      | 1.38     | 1.786             | 0.030              |

Supplementary. Table S2. Gene expression in the Nac of both male and female rats using RT-qPCR

| <u>Ensemb ID</u>    | <u>Gene symbol</u> | <u>Full name</u>                                                     | <u>Chromo some</u> | <u>BaseMean iP</u> | <u>BaseMean ISCS-B</u> | <u>FC 2</u> | <u>log2FC 2</u> | <u>pval</u> | <u>padj</u> |
|---------------------|--------------------|----------------------------------------------------------------------|--------------------|--------------------|------------------------|-------------|-----------------|-------------|-------------|
| ENSRNOG00000010597  | Slc5a7             | solute carrier family 5 (sodium/choline cotransporter); member 7     | chr9               | 1907.52            | 449.09                 | 0.235       | -2.09           | 0.00        | 0.000       |
| ENSRNOG00000025012  | Chat               | choline O-acetyltransferase                                          | chr16              | 944.03             | 235.43                 | 0.249       | -2.00           | 0.00        | 0.000       |
| ENSRNOG00000019447  | Ecel1              | endothelin converting enzyme-like 1                                  | chr9               | 2243.20            | 674.62                 | 0.301       | -1.73           | 0.00        | 0.000       |
| ENSRNOG00000026091  | Slc10a4            | solute carrier family 10; member 4                                   | chr14              | 719.90             | 180.36                 | 0.251       | -2.00           | 0.00        | 0.000       |
| ENSRNOG00000062141  | Slc18a3            | solute carrier family 18 member A3                                   | chr16              | 394.56             | 88.07                  | 0.223       | -2.16           | 0.00        | 0.000       |
| ENSRNOG00000013953  | Ntrk1              | neurotrophic tyrosine kinase; receptor; type 1                       | chr2               | 502.74             | 129.07                 | 0.257       | -1.96           | 0.00        | 0.000       |
| ENSRNOG00000015835  | Cacna2d2           | calcium channel; voltage-dependent; alpha 2/delta subunit 2          | chr8               | 3379.89            | 1580.50                | 0.468       | -1.10           | 0.00        | 0.000       |
| ENSRNOG00000005392  | Ngfr               | nerve growth factor receptor                                         | chr10              | 615.47             | 61.58                  | 0.100       | -3.32           | 0.00        | 0.000       |
| ENSRNOG00000050841  | Ache               | acetylcholinesterase                                                 | chr12              | 2748.55            | 1127.17                | 0.410       | -1.29           | 0.00        | 0.000       |
| ENSRNOG00000008176  | Nppa               | natriuretic peptide A                                                | chr5               | 171.07             | 423.32                 | 2.475       | 1.31            | 0.00        | 0.000       |
| ENSRNOG00000028348  | Lhx8               | LIM homeobox 8                                                       | chr2               | 511.42             | 95.09                  | 0.186       | -2.43           | 0.00        | 0.000       |
| ENSRNOG00000021084  | Mpeg1              | macrophage expressed 1                                               | chr1               | 1237.10            | 565.67                 | 0.457       | -1.13           | 0.00        | 0.000       |
| ENSRNOG00000005996  | Lhx6               | LIM homeobox 6                                                       | chr3               | 1090.45            | 427.30                 | 0.392       | -1.35           | 0.00        | 0.000       |
| ENSRNOG00000007581  | Slc17a8            | solute carrier family 17 (vesicular glutamate transporter); member 8 | chr7               | 277.44             | 110.02                 | 0.397       | -1.33           | 0.00        | 0.000       |
| ENSRNOG00000005853  | Tacr1              | tachykinin receptor 1                                                | chr4               | 421.33             | 194.06                 | 0.461       | -1.12           | 0.00        | 0.000       |
| ENSRNOG000000031397 | Stk32b             | serine/threonine kinase 32B                                          | chr14              | 113.78             | 31.89                  | 0.280       | -1.84           | 0.00        | 0.000       |
| ENSRNOG00000003066  | Wnt9a              | wingless-type MMTV integration site family; member 9A                | chr10              | 163.63             | 353.69                 | 2.162       | 1.11            | 0.00        | 0.000       |
| ENSRNOG000000059714 | Hsp90aa1           | heat shock protein 90; alpha (cytosolic); class A member 1           | chr6               | 397.27             | 193.89                 | 0.488       | -1.03           | 0.00        | 0.000       |
| ENSRNOG00000028708  | Ntsr1              | neurotensin receptor 1                                               | chr3               | 175.63             | 53.57                  | 0.305       | -1.71           | 0.00        | 0.000       |
| ENSRNOG00000008855  | Gjb2               | gap junction protein; beta 2                                         | chr15              | 243.93             | 687.01                 | 2.816       | 1.49            | 0.00        | 0.000       |
| ENSRNOG00000006120  | Shh                | sonic hedgehog                                                       | chr4               | 127.48             | 41.34                  | 0.324       | -1.62           | 0.00        | 0.000       |
| ENSRNOG00000021745  | Bhlhe22            | basic helix-loop-helix family; member e22                            | chr2               | 175.92             | 477.28                 | 2.713       | 1.44            | 0.00        | 0.000       |
| ENSRNOG00000008697  | Nov                | nephroblastoma overexpressed                                         | chr7               | 652.83             | 1675.98                | 2.567       | 1.36            | 0.00        | 0.000       |
| ENSRNOG00000016057  | Kcnj13             | potassium channel; inwardly rectifying subfamily J; member 13        | chr9               | 47.25              | 133.95                 | 2.835       | 1.50            | 0.00        | 0.000       |
| ENSRNOG00000021063  | Grin2d             | glutamate receptor; ionotropic; N-methyl D-aspartate 2D              | chr1               | 551.57             | 233.09                 | 0.423       | -1.24           | 0.00        | 0.000       |
| ENSRNOG00000003183  | Fmod               | fibromodulin                                                         | chr13              | 455.54             | 991.71                 | 2.177       | 1.12            | 0.00        | 0.000       |
| ENSRNOG00000046863  | C1qI2              | complement component 1; q subcomponent-like 2                        | chr13              | 141.25             | 52.60                  | 0.372       | -1.43           | 0.00        | 0.000       |
| ENSRNOG00000053384  | Bmp7               | bone morphogenetic protein 7                                         | chr3               | 155.33             | 396.83                 | 2.555       | 1.35            | 0.00        | 0.000       |
| ENSRNOG00000004372  | Cbln4              | cerebellin 4 precursor                                               | chr3               | 323.56             | 130.42                 | 0.403       | -1.31           | 0.00        | 0.000       |
| ENSRNOG00000005580  | Itgb4              | integrin; beta 4                                                     | chr10              | 221.95             | 498.72                 | 2.247       | 1.17            | 0.00        | 0.000       |
| ENSRNOG00000015957  | F13a1              | coagulation factor XIII; A1 polypeptide                              | chr17              | 57.84              | 143.34                 | 2.478       | 1.31            | 0.00        | 0.000       |
| ENSRNOG00000027220  | Pcdhgb8            | protocadherin gamma subfamily B; 8                                   | chr18              | 218.08             | 104.31                 | 0.478       | -1.06           | 0.00        | 0.000       |

|                     |          |                                                                       |       |          |          |       |       |      |       |
|---------------------|----------|-----------------------------------------------------------------------|-------|----------|----------|-------|-------|------|-------|
| ENSRNOG00000020620  | Ppp1r32  | protein phosphatase 1; regulatory subunit 32                          | chr1  | 85.04    | 26.50    | 0.312 | -1.68 | 0.00 | 0.000 |
| ENSRNOG00000055049  | Aldh1a2  | aldehyde dehydrogenase 1 family; member A2                            | chr8  | 330.43   | 792.82   | 2.399 | 1.26  | 0.00 | 0.000 |
| ENSRNOG00000004210  | Osr1     | odd-skipped related transcription factor 1                            | chr6  | 51.57    | 151.03   | 2.928 | 1.55  | 0.00 | 0.000 |
| ENSRNOG00000019495  | Gbx2     | gastrulation brain homeobox 2                                         | chr9  | 97.20    | 35.79    | 0.368 | -1.44 | 0.00 | 0.000 |
| ENSRNOG000000057092 | Slfn3    | schlafen 3                                                            | chr10 | 40.56    | 106.64   | 2.629 | 1.39  | 0.00 | 0.000 |
| ENSRNOG00000026110  | Scml4    | sex comb on midleg-like 4 (Drosophila)                                | chr20 | 194.72   | 94.20    | 0.484 | -1.05 | 0.00 | 0.000 |
| ENSRNOG00000016957  | Igfbp2   | insulin-like growth factor binding protein 2                          | chr9  | 716.69   | 1576.29  | 2.199 | 1.14  | 0.00 | 0.000 |
| ENSRNOG00000018715  | Clec10a  | C-type lectin domain family 10; member A                              | chr10 | 34.74    | 95.00    | 2.735 | 1.45  | 0.00 | 0.000 |
| ENSRNOG00000032844  | RT1-Da   | RT1 class II; locus Da                                                | chr20 | 42.83    | 124.97   | 2.918 | 1.55  | 0.00 | 0.000 |
| ENSRNOG00000016085  | Mpzl2    | myelin protein zero-like 2                                            | chr8  | 49.78    | 191.67   | 3.851 | 1.95  | 0.00 | 0.000 |
| ENSRNOG00000004614  | Lypd6b   | LY6/PLAUR domain containing 6B                                        | chr3  | 251.59   | 112.77   | 0.448 | -1.16 | 0.00 | 0.000 |
| ENSRNOG00000020369  | Igf2     | insulin-like growth factor 2                                          | chr1  | 1486.36  | 2997.30  | 2.017 | 1.01  | 0.00 | 0.000 |
| ENSRNOG000000056714 | Sla      | src-like adaptor                                                      | chr7  | 210.11   | 458.74   | 2.183 | 1.13  | 0.00 | 0.000 |
| ENSRNOG00000015259  | Pth2r    | parathyroid hormone 2 receptor                                        | chr9  | 65.84    | 20.82    | 0.316 | -1.66 | 0.00 | 0.000 |
| ENSRNOG00000015550  | Ptgds    | prostaglandin D2 synthase (brain)                                     | chr3  | 13019.93 | 35901.42 | 2.757 | 1.46  | 0.00 | 0.000 |
| ENSRNOG00000012727  | Trpc7    | transient receptor potential cation channel; subfamily C; member 7    | chr17 | 237.69   | 111.63   | 0.470 | -1.09 | 0.00 | 0.000 |
| ENSRNOG00000000723  | RT1-CE5  | RT1 class I; locus CE5                                                | chr20 | 62.06    | 134.65   | 2.170 | 1.12  | 0.00 | 0.000 |
| ENSRNOG00000030763  | Dpp4     | dipeptidylpeptidase 4                                                 | chr3  | 48.24    | 118.80   | 2.463 | 1.30  | 0.00 | 0.000 |
| ENSRNOG00000046848  | PCOLCE2  | procollagen C-endopeptidase enhancer 2                                | chr8  | 31.42    | 85.66    | 2.726 | 1.45  | 0.00 | 0.000 |
| ENSRNOG00000004179  | Nts      | neurotensin                                                           | chr7  | 627.17   | 240.83   | 0.384 | -1.38 | 0.00 | 0.000 |
| ENSRNOG00000015071  | Zim1     | zinc finger; imprinted 1                                              | chr1  | 237.23   | 65.66    | 0.277 | -1.85 | 0.00 | 0.000 |
| ENSRNOG00000019141  | Ch25h    | cholesterol 25-hydroxylase                                            | chr1  | 51.27    | 121.82   | 2.376 | 1.25  | 0.00 | 0.000 |
| ENSRNOG00000013369  | Gbx1     | gastrulation brain homeobox 1                                         | chr4  | 52.01    | 15.92    | 0.306 | -1.71 | 0.00 | 0.000 |
| ENSRNOG00000030530  | Gzmm     | granzyme M (lymphocyte met-ase 1)                                     | chr7  | 34.83    | 87.85    | 2.522 | 1.33  | 0.00 | 0.000 |
| ENSRNOG00000018215  | Slc22a6  | solute carrier family 22 (organic anion transporter); member 6        | chr1  | 193.48   | 524.39   | 2.710 | 1.44  | 0.00 | 0.000 |
| ENSRNOG00000017409  | Wnt6     | wingless-type MMTV integration site family; member 6                  | chr9  | 59.52    | 188.51   | 3.167 | 1.66  | 0.00 | 0.000 |
| ENSRNOG00000011648  | Aqp1     | aquaporin 1                                                           | chr4  | 53.34    | 178.68   | 3.350 | 1.74  | 0.00 | 0.000 |
| ENSRNOG00000015668  | Ccl19    | chemokine (C-C motif) ligand 19                                       | chr5  | 39.47    | 94.96    | 2.406 | 1.27  | 0.00 | 0.000 |
| ENSRNOG000000049213 | Npy2r    | neuropeptide Y receptor Y2                                            | chr2  | 126.61   | 56.71    | 0.448 | -1.16 | 0.00 | 0.000 |
| ENSRNOG00000018735  | Cd74     | Cd74 molecule; major histocompatibility complex; class II             | chr18 | 128.83   | 375.80   | 2.917 | 1.54  | 0.00 | 0.000 |
| ENSRNOG000000055705 | Htr7     | 5-hydroxytryptamine (serotonin) receptor 7; adenylate cyclase-coupled | chr1  | 112.45   | 53.51    | 0.476 | -1.07 | 0.00 | 0.000 |
| ENSRNOG000000003172 | Serpinf1 | serpin peptidase inhibitor; clade F (alpha-2 antiplasmin; pigment     | chr10 | 159.55   | 421.71   | 2.643 | 1.40  | 0.00 | 0.001 |
| ENSRNOG00000026907  | Zbtb37   | zinc finger and BTB domain containing 37                              | chr13 | 61.34    | 22.85    | 0.373 | -1.42 | 0.00 | 0.001 |

|                    |            |                                                                                                                            |       |         |         |       |       |      |       |
|--------------------|------------|----------------------------------------------------------------------------------------------------------------------------|-------|---------|---------|-------|-------|------|-------|
| ENSRNOG00000019118 | Slc13a3    | solute carrier family 13 (sodium-dependent dicarboxylate transporter);                                                     | chr3  | 808.48  | 1679.85 | 2.078 | 1.06  | 0.00 | 0.001 |
| ENSRNOG00000027392 | Ccdc187    | coiled-coil domain containing 187                                                                                          | chr3  | 185.69  | 81.53   | 0.439 | -1.19 | 0.00 | 0.001 |
| ENSRNOG00000018251 | Mrc1       | mannose receptor; C type 1                                                                                                 | chr17 | 153.15  | 311.13  | 2.031 | 1.02  | 0.00 | 0.001 |
| ENSRNOG00000025670 | Shisa3     | shisa family member 3                                                                                                      | chr14 | 110.59  | 384.35  | 3.475 | 1.80  | 0.00 | 0.001 |
| ENSRNOG00000027935 | Lrrc34     | leucine rich repeat containing 34                                                                                          | chr2  | 60.78   | 19.72   | 0.324 | -1.62 | 0.00 | 0.001 |
| ENSRNOG00000008644 | Nkx2-1     | NK2 homeobox 1                                                                                                             | chr6  | 145.37  | 47.39   | 0.326 | -1.62 | 0.00 | 0.001 |
| N/A                | LOC310926  | hypothetical protein LOC310926                                                                                             | chr1  | 47.59   | 225.83  | 4.746 | 2.25  | 0.00 | 0.001 |
| ENSRNOG00000012995 | Gpr165     | G protein-coupled receptor 165                                                                                             | chrX  | 1103.53 | 295.73  | 0.268 | -1.90 | 0.00 | 0.001 |
| ENSRNOG00000013426 | Mrgprf     | MAS-related GPR; member F                                                                                                  | chr1  | 33.28   | 84.71   | 2.545 | 1.35  | 0.00 | 0.001 |
| ENSRNOG00000011642 | Tfap2d     | transcription factor AP-2 delta                                                                                            | chr9  | 25.23   | 64.33   | 2.550 | 1.35  | 0.00 | 0.002 |
| ENSRNOG00000046972 | Chrm2      | cholinergic receptor; muscarinic 2                                                                                         | chr4  | 274.75  | 132.94  | 0.484 | -1.05 | 0.00 | 0.002 |
| ENSRNOG00000017459 | C1q13      | complement component 1; q subcomponent-like 3                                                                              | chr17 | 211.42  | 427.34  | 2.021 | 1.02  | 0.00 | 0.002 |
| ENSRNOG00000010128 | Slc27a2    | solute carrier family 27 (fatty acid transporter); member 2                                                                | chr3  | 170.64  | 55.36   | 0.324 | -1.62 | 0.00 | 0.002 |
| ENSRNOG00000014776 | Adcy7      | adenylate cyclase 7                                                                                                        | chr19 | 345.31  | 152.71  | 0.442 | -1.18 | 0.00 | 0.002 |
| ENSRNOG00000012448 | Chrn3      | cholinergic receptor; nicotinic; beta 3 (neuronal)                                                                         | chr16 | 23.14   | 59.53   | 2.573 | 1.36  | 0.00 | 0.002 |
| ENSRNOG00000023576 | RGD1305645 | similar to RIKEN cDNA 1500015O10                                                                                           | chr9  | 51.08   | 140.24  | 2.746 | 1.46  | 0.00 | 0.002 |
| ENSRNOG00000048924 | Islr       | immunoglobulin superfamily containing leucine-rich repeat                                                                  | chr8  | 160.70  | 377.94  | 2.352 | 1.23  | 0.00 | 0.003 |
| ENSRNOG00000039086 | Ccdc153    | coiled-coil domain containing 153                                                                                          | chr8  | 81.94   | 38.58   | 0.471 | -1.09 | 0.00 | 0.003 |
| ENSRNOG00000038600 | Dnaaf3     | dynein; axonemal; assembly factor 3                                                                                        | chr1  | 98.84   | 48.18   | 0.487 | -1.04 | 0.00 | 0.003 |
| ENSRNOG00000012608 | Tmem212    | transmembrane protein 212                                                                                                  | chr2  | 35.00   | 1.44    | 0.041 | -4.60 | 0.00 | 0.003 |
| ENSRNOG00000011821 | S100a4     | S100 calcium-binding protein A4                                                                                            | chr2  | 47.94   | 112.81  | 2.353 | 1.23  | 0.00 | 0.003 |
| ENSRNOG00000018087 | Vim        | vimentin                                                                                                                   | chr17 | 1688.49 | 3433.83 | 2.034 | 1.02  | 0.00 | 0.003 |
| ENSRNOG00000031100 | Klhl1      | kelch-like family member 1                                                                                                 | chr15 | 130.30  | 32.82   | 0.252 | -1.99 | 0.00 | 0.003 |
| ENSRNOG00000011184 | Slc13a4    | solute carrier family 13 (sodium/sulfate symporter); member 4                                                              | chr4  | 517.88  | 1270.80 | 2.454 | 1.30  | 0.00 | 0.004 |
| ENSRNOG00000025691 | Pla2g7     | phospholipase A2; group VII (platelet-activating factor acetylhydrolase; serine rich and transmembrane domain containing 2 | chr9  | 254.10  | 565.86  | 2.227 | 1.16  | 0.00 | 0.004 |
| N/A                | Sertm2     |                                                                                                                            | chrX  | 126.16  | 56.28   | 0.446 | -1.16 | 0.00 | 0.004 |
| ENSRNOG00000011823 | Tfap2b     | transcription factor AP-2 beta                                                                                             | chr9  | 38.77   | 108.85  | 2.808 | 1.49  | 0.00 | 0.004 |
| ENSRNOG00000011251 | Hcrtr2     | hypocretin (orexin) receptor 2                                                                                             | chr8  | 89.96   | 37.48   | 0.417 | -1.26 | 0.00 | 0.005 |
| ENSRNOG00000060867 | Rln1       | relaxin 1                                                                                                                  | chr1  | 18.08   | 48.48   | 2.681 | 1.42  | 0.00 | 0.006 |
| ENSRNOG00000028041 | Tnnt1      | troponin T type 1 (skeletal; slow)                                                                                         | chr1  | 162.73  | 76.38   | 0.469 | -1.09 | 0.00 | 0.007 |
| ENSRNOG00000035555 | Mir384     | microRNA 384                                                                                                               | chrX  | 18.22   | 2.92    | 0.160 | -2.64 | 0.00 | 0.007 |
| ENSRNOG00000013720 | Aebp1      | AE binding protein 1                                                                                                       | chr14 | 891.93  | 1813.33 | 2.033 | 1.02  | 0.00 | 0.007 |
| ENSRNOG00000022957 | Ctxn3      | cortixin 3                                                                                                                 | chr18 | 293.69  | 135.06  | 0.460 | -1.12 | 0.00 | 0.007 |

|                      |          |                                                                 |       |        |        |       |       |      |       |
|----------------------|----------|-----------------------------------------------------------------|-------|--------|--------|-------|-------|------|-------|
| ENSRNOG00000013681   | Kcns1    | potassium voltage-gated channel; modifier subfamily S; member 1 | chr3  | 39.16  | 79.33  | 2.026 | 1.02  | 0.00 | 0.008 |
| ENSRNOG000000051684  | St8sia6  | ST8 alpha-N-acetyl-neuraminide alpha-2;8-sialyltransferase 6    | chr17 | 24.96  | 6.40   | 0.256 | -1.96 | 0.00 | 0.008 |
| ENSRNOG000000008492  | Ccdc19   | cilia and flagella associated protein 45 (Cfap45)               | chr13 | 46.23  | 17.71  | 0.383 | -1.38 | 0.00 | 0.009 |
| ENSRNOG000000002120  | Spata18  | spermatogenesis associated 18                                   | chr14 | 47.73  | 5.79   | 0.121 | -3.04 | 0.00 | 0.009 |
| ENSRNOG000000013768  | Defb1    | defensin beta 1                                                 | chr16 | 21.26  | 52.43  | 2.466 | 1.30  | 0.00 | 0.009 |
| N/A                  | Tnxa-ps1 | tenascin XA, pseudogene 1                                       | chr20 | 36.39  | 76.25  | 2.096 | 1.07  | 0.00 | 0.010 |
| ENSRNOG000000006639  | Scn9a    | sodium channel; voltage-gated; type IX; alpha subunit           | chr3  | 706.54 | 335.16 | 0.474 | -1.08 | 0.00 | 0.010 |
| ENSRNOG000000040287  | Cyp1b1   | cytochrome P450; family 1; subfamily b; polypeptide 1           | chr6  | 31.89  | 87.04  | 2.730 | 1.45  | 0.00 | 0.010 |
| N/A                  | Gstm2    | glutathione S-transferase mu 2                                  | chr2  | 50.33  | 156.58 | 3.111 | 1.64  | 0.00 | 0.011 |
| ENSRNOG000000018346  | Agtr1a   | angiotensin II receptor; type 1a                                | chr17 | 31.96  | 67.92  | 2.125 | 1.09  | 0.00 | 0.012 |
| ENSRNOG000000005781  | Wnt16    | wingless-type MMTV integration site family; member 16           | chr4  | 52.20  | 107.93 | 2.068 | 1.05  | 0.00 | 0.012 |
| ENSRNOG000000019358  | Esr1     | estrogen receptor 1                                             | chr1  | 63.93  | 15.29  | 0.239 | -2.06 | 0.00 | 0.013 |
| ENSRNOG0000000052564 | Gpx3     | glutathione peroxidase 3                                        | chr10 | 634.95 | 208.23 | 0.328 | -1.61 | 0.00 | 0.014 |
| ENSRNOG000000031211  | Acsm5    | acyl-CoA synthetase medium-chain family member 5                | chr1  | 65.09  | 131.20 | 2.016 | 1.01  | 0.00 | 0.014 |
| ENSRNOG000000047098  | Hbb      | beta-globin                                                     | chr1  | 55.03  | 198.24 | 3.602 | 1.85  | 0.00 | 0.014 |
| ENSRNOG000000000451  | RT1-Ba   | RT1 class II; locus Ba                                          | chr20 | 34.91  | 71.82  | 2.057 | 1.04  | 0.00 | 0.015 |
| ENSRNOG000000061182  | Gabre    | gamma-aminobutyric acid (GABA) A receptor; epsilon              | chrX  | 117.35 | 10.41  | 0.089 | -3.49 | 0.00 | 0.017 |
| ENSRNOG000000018316  | Grap2    | GRB2-related adaptor protein 2                                  | chr7  | 17.10  | 42.76  | 2.500 | 1.32  | 0.00 | 0.017 |
| ENSRNOG000000010253  | Cd163    | CD163 molecule                                                  | chr4  | 54.68  | 114.77 | 2.099 | 1.07  | 0.00 | 0.017 |
| ENSRNOG000000002862  | Clcn5    | chloride channel; voltage-sensitive 5                           | chrX  | 207.26 | 81.64  | 0.394 | -1.34 | 0.00 | 0.018 |
| ENSRNOG000000030021  | Ccl6     | chemokine (C-C motif) ligand 6                                  | chr10 | 22.10  | 51.16  | 2.315 | 1.21  | 0.00 | 0.018 |
| ENSRNOG0000000059852 | Rn5-8s   | 5.8S ribosomal RNA                                              | chr14 | 2.95   | 21.96  | 7.453 | 2.90  | 0.00 | 0.019 |
| ENSRNOG000000021225  | Oxt      | oxytocin/neurophysin 1 prepropeptide                            | chr3  | 446.57 | 1.17   | 0.003 | -8.58 | 0.00 | 0.019 |
| ENSRNOG000000041468  | Mir1188  | microRNA 1188                                                   | chr6  | 56.85  | 26.72  | 0.470 | -1.09 | 0.00 | 0.020 |
| ENSRNOG000000010362  | Anxa2    | annexin A2                                                      | chr8  | 215.47 | 450.40 | 2.090 | 1.06  | 0.00 | 0.022 |
| ENSRNOG000000042139  | Clec4a1  | C-type lectin domain family 4; member A1                        | chr4  | 21.36  | 47.76  | 2.237 | 1.16  | 0.00 | 0.022 |
| ENSRNOG000000009372  | Tacr3    | tachykinin receptor 3                                           | chr2  | 132.52 | 58.11  | 0.439 | -1.19 | 0.00 | 0.023 |
| ENSRNOG000000020151  | Cdh1     | cadherin 1                                                      | chr19 | 97.64  | 284.01 | 2.909 | 1.54  | 0.00 | 0.023 |
| ENSRNOG000000013838  | Hcrtr1   | hypocretin (orexin) receptor 1                                  | chr5  | 51.93  | 23.47  | 0.452 | -1.15 | 0.00 | 0.024 |
| ENSRNOG000000019890  | Folr2    | folate receptor 2 (fetal)                                       | chr1  | 10.67  | 31.06  | 2.911 | 1.54  | 0.00 | 0.024 |
| N/A                  | Capns2   | calpain, small subunit 2                                        | chr19 | 50.67  | 23.19  | 0.458 | -1.13 | 0.00 | 0.025 |
| ENSRNOG000000028548  | Ccl9     | chemokine (C-C motif) ligand 9                                  | chr10 | 9.81   | 33.78  | 3.442 | 1.78  | 0.00 | 0.025 |
| ENSRNOG000000028015  | Pf4      | platelet factor 4                                               | chr14 | 17.90  | 44.35  | 2.478 | 1.31  | 0.00 | 0.026 |

|                     |              |                                                                      |       |         |          |       |       |      |       |
|---------------------|--------------|----------------------------------------------------------------------|-------|---------|----------|-------|-------|------|-------|
| ENSRNOG00000023664  | Lepr         | leptin receptor                                                      | chr5  | 224.22  | 460.22   | 2.052 | 1.04  | 0.00 | 0.026 |
| ENSRNOG00000012301  | Cfap161      | cilia and flagella associated protein 161                            | chr1  | 38.19   | 15.39    | 0.403 | -1.31 | 0.00 | 0.029 |
| ENSRNOG00000033734  | Tnnt2        | troponin T type 2 (cardiac)                                          | chr13 | 132.76  | 334.28   | 2.518 | 1.33  | 0.00 | 0.029 |
| ENSRNOG00000027658  | Gpr101       | G protein-coupled receptor 101                                       | chrX  | 733.37  | 359.77   | 0.491 | -1.03 | 0.00 | 0.030 |
| ENSRNOG00000012450  | Dynlrb2      | dynein light chain roadblock-type 2                                  | chr19 | 27.75   | 8.41     | 0.303 | -1.72 | 0.00 | 0.031 |
| ENSRNOG00000018445  | Agt          | angiotensinogen (serpin peptidase inhibitor; clade A; member 8)      | chr19 | 6663.91 | 3223.93  | 0.484 | -1.05 | 0.00 | 0.032 |
| ENSRNOG00000007765  | Frzb         | frizzled-related protein                                             | chr3  | 173.78  | 390.25   | 2.246 | 1.17  | 0.00 | 0.033 |
| ENSRNOG00000022256  | Cxcl10       | chemokine (C-X-C motif) ligand 10                                    | chr14 | 7.60    | 24.64    | 3.245 | 1.70  | 0.00 | 0.034 |
| ENSRNOG00000020650  | Slc17a7      | solute carrier family 17 (vesicular glutamate transporter); member 7 | chr1  | 6614.15 | 15565.80 | 2.353 | 1.23  | 0.00 | 0.036 |
| ENSRNOG00000037060  | Odf3b        | outer dense fiber of sperm tails 3B                                  | chr7  | 56.24   | 27.66    | 0.492 | -1.02 | 0.00 | 0.036 |
| ENSRNOG000000061299 | LOC100134871 | beta globin minor gene                                               | chr1  | 200.83  | 761.83   | 3.793 | 1.92  | 0.00 | 0.037 |
| ENSRNOG00000026150  | Zar1         | zygote arrest 1                                                      | chr14 | 43.63   | 19.11    | 0.438 | -1.19 | 0.00 | 0.038 |
| ENSRNOG00000007457  | Serping1     | serpin peptidase inhibitor; clade G (C1 inhibitor); member 1         | chr3  | 218.89  | 470.52   | 2.150 | 1.10  | 0.00 | 0.041 |
| ENSRNOG00000003357  | Col3a1       | collagen; type III; alpha 1                                          | chr9  | 564.80  | 1146.39  | 2.030 | 1.02  | 0.00 | 0.044 |
| ENSRNOG00000018693  | Asgr1        | asialoglycoprotein receptor 1                                        | chr10 | 21.21   | 45.89    | 2.164 | 1.11  | 0.00 | 0.045 |
| ENSRNOG00000014893  | Wdr63        | WD repeat domain 63                                                  | chr2  | 76.19   | 15.38    | 0.202 | -2.31 | 0.00 | 0.045 |
| ENSRNOG00000026661  | Gpr81        | G protein-coupled receptor 81                                        | chr12 | 19.20   | 42.62    | 2.220 | 1.15  | 0.00 | 0.049 |
| ENSRNOG00000002881  | Ddr2         | discoidin domain receptor tyrosine kinase 2                          | chr13 | 184.83  | 378.47   | 2.048 | 1.03  | 0.00 | 0.050 |
| ENSRNOG00000018191  | Oprm1        | opioid receptor; mu 1                                                | chr1  | 199.63  | 76.55    | 0.383 | -1.38 | 0.00 | 0.053 |
| ENSRNOG00000009197  | Asb4         | ankyrin repeat and SOCS box-containing 4                             | chr4  | 51.62   | 3.75     | 0.073 | -3.78 | 0.00 | 0.054 |
| ENSRNOG000000058105 | Hbb-b1       | hemoglobin, beta adult major chain                                   | chr1  | 245.57  | 759.81   | 3.094 | 1.63  | 0.00 | 0.055 |
| ENSRNOG00000017416  | Ppic         | peptidylprolyl isomerase C                                           | chr18 | 47.06   | 107.02   | 2.274 | 1.19  | 0.00 | 0.056 |
| ENSRNOG00000047763  | Mir3547      | microRNA 3547                                                        | chr10 | 102.89  | 35.15    | 0.342 | -1.55 | 0.00 | 0.058 |
| ENSRNOG00000019584  | Dlk1         | delta-like 1 homolog (Drosophila)                                    | chr6  | 477.30  | 165.13   | 0.346 | -1.53 | 0.00 | 0.070 |
| ENSRNOG000000059469 | Otx1         | orthodenticle homeobox 1                                             | chr14 | 23.65   | 48.43    | 2.047 | 1.03  | 0.00 | 0.071 |
| ENSRNOG00000012843  | Aspg         | asparaginase                                                         | chr6  | 36.16   | 112.50   | 3.111 | 1.64  | 0.00 | 0.074 |
| ENSRNOG00000016654  | Galr1        | galanin receptor 1                                                   | chr18 | 56.93   | 21.77    | 0.382 | -1.39 | 0.00 | 0.075 |
| ENSRNOG00000018290  | Alx3         | ALX homeobox 3                                                       | chr2  | 22.32   | 52.26    | 2.341 | 1.23  | 0.00 | 0.078 |
| ENSRNOG00000016581  | Serpinb1a    | serine (or cysteine) proteinase inhibitor; clade B; member 1a        | chr17 | 52.70   | 118.43   | 2.247 | 1.17  | 0.00 | 0.078 |
| ENSRNOG00000016678  | Angptl2      | angiopoietin-like 2                                                  | chr3  | 70.74   | 158.80   | 2.245 | 1.17  | 0.01 | 0.083 |
| ENSRNOG000000062013 | Adprh1       | ADP-ribosylhydrolase like 1                                          | chr16 | 14.84   | 32.81    | 2.211 | 1.14  | 0.01 | 0.086 |
| ENSRNOG00000002217  | Plac8        | placenta-specific 8                                                  | chr14 | 9.02    | 25.18    | 2.793 | 1.48  | 0.01 | 0.087 |
| ENSRNOG000000028417 | Neurod2      | neuronal differentiation 2                                           | chr10 | 179.69  | 362.67   | 2.018 | 1.01  | 0.01 | 0.087 |

|                     |         |                                                             |       |         |         |       |       |      |       |
|---------------------|---------|-------------------------------------------------------------|-------|---------|---------|-------|-------|------|-------|
| ENSRNOG00000004712  | Angptl1 | angiopoietin-like 1                                         | chr13 | 23.35   | 52.25   | 2.237 | 1.16  | 0.01 | 0.089 |
| ENSRNOG000000011568 | Rspo3   | R-spondin 3                                                 | chr1  | 70.86   | 151.03  | 2.131 | 1.09  | 0.01 | 0.094 |
| ENSRNOG000000002385 | Prg4    | proteoglycan 4                                              | chr13 | 131.08  | 284.57  | 2.171 | 1.12  | 0.01 | 0.095 |
| ENSRNOG000000006146 | Trim54  | tripartite motif-containing 54                              | chr6  | 221.62  | 523.17  | 2.361 | 1.24  | 0.01 | 0.095 |
| ENSRNOG000000011101 | Twist1  | twist family bHLH transcription factor 1                    | chr6  | 21.61   | 50.09   | 2.318 | 1.21  | 0.01 | 0.102 |
| ENSRNOG000000019445 | Msln    | mesothelin                                                  | chr10 | 18.75   | 73.88   | 3.939 | 1.98  | 0.01 | 0.104 |
| ENSRNOG000000053402 | Gabrq   | gamma-aminobutyric acid (GABA) A receptor; theta            | chrX  | 79.36   | 11.11   | 0.140 | -2.84 | 0.01 | 0.111 |
| ENSRNOG000000005049 | Tbr1    | T-box; brain; 1                                             | chr3  | 340.47  | 755.02  | 2.218 | 1.15  | 0.01 | 0.112 |
| ENSRNOG000000049792 | Gla3    | glycine receptor; alpha 3                                   | chr16 | 29.31   | 12.74   | 0.435 | -1.20 | 0.01 | 0.117 |
| ENSRNOG000000023991 | Rab20   | RAB20; member RAS oncogene family                           | chr16 | 15.18   | 33.24   | 2.190 | 1.13  | 0.01 | 0.118 |
| ENSRNOG000000058560 | Col2a1  | collagen; type II; alpha 1                                  | chr7  | 159.84  | 53.87   | 0.337 | -1.57 | 0.01 | 0.122 |
| ENSRNOG000000009005 | Slco2a1 | solute carrier organic anion transporter family; member 2a1 | chr8  | 54.16   | 141.26  | 2.608 | 1.38  | 0.01 | 0.122 |
| ENSRNOG000000047446 | Foxc2   | forkhead box C2                                             | chr19 | 26.98   | 76.31   | 2.829 | 1.50  | 0.01 | 0.125 |
| ENSRNOG000000010053 | Calcr   | calcitonin receptor                                         | chr4  | 714.88  | 150.72  | 0.211 | -2.25 | 0.01 | 0.130 |
| ENSRNOG000000015599 | Mall    | mal; T-cell differentiation protein-like                    | chr3  | 19.45   | 40.46   | 2.080 | 1.06  | 0.01 | 0.136 |
| ENSRNOG000000024172 | T2      | brachyury 2                                                 | chr1  | 52.76   | 24.64   | 0.467 | -1.10 | 0.01 | 0.142 |
| ENSRNOG000000010699 | Trim43a | tripartite motif-containing 43A                             | chr8  | 29.84   | 13.86   | 0.465 | -1.11 | 0.01 | 0.150 |
| ENSRNOG000000039107 | Mfrp    | membrane frizzled-related protein                           | chr8  | 52.76   | 146.83  | 2.783 | 1.48  | 0.01 | 0.150 |
| ENSRNOG000000005930 | Nnmt    | nicotinamide N-methyltransferase                            | chr8  | 14.25   | 29.90   | 2.098 | 1.07  | 0.01 | 0.151 |
| ENSRNOG000000007027 | Hgf     | hepatocyte growth factor                                    | chr4  | 44.24   | 89.90   | 2.032 | 1.02  | 0.02 | 0.166 |
| ENSRNOG000000008394 | Prg2    | proteoglycan 2                                              | chr3  | 8.53    | 20.60   | 2.415 | 1.27  | 0.02 | 0.179 |
| ENSRNOG000000006090 | Ucn     | urocortin                                                   | chr6  | 6.04    | 16.31   | 2.702 | 1.43  | 0.02 | 0.179 |
| ENSRNOG000000006204 | Slc30a3 | solute carrier family 30 (zinc transporter); member 3       | chr6  | 825.69  | 1776.57 | 2.152 | 1.11  | 0.02 | 0.182 |
| ENSRNOG000000001959 | Mx1     | myxovirus (influenza virus) resistance 1                    | chr11 | 21.67   | 78.82   | 3.638 | 1.86  | 0.02 | 0.186 |
| ENSRNOG000000047917 | Plscr5  | phospholipid scramblase family; member 5                    | chr8  | 20.45   | 9.06    | 0.443 | -1.17 | 0.02 | 0.189 |
| ENSRNOG000000037149 | Bcl2l15 | BCL2-like 15                                                | chr2  | 23.97   | 11.00   | 0.459 | -1.12 | 0.02 | 0.191 |
| ENSRNOG000000011160 | Sv2b    | synaptic vesicle glycoprotein 2b                            | chr1  | 4074.95 | 8335.78 | 2.046 | 1.03  | 0.02 | 0.195 |
| ENSRNOG000000017783 | Sfrp1   | secreted frizzled-related protein 1                         | chr16 | 388.47  | 867.27  | 2.233 | 1.16  | 0.02 | 0.195 |
| ENSRNOG000000005048 | Trhr    | thyrotropin releasing hormone receptor                      | chr7  | 167.52  | 73.43   | 0.438 | -1.19 | 0.02 | 0.201 |
| ENSRNOG000000032063 | Gfral   | GDNF family receptor alpha like                             | chr8  | 30.65   | 66.42   | 2.167 | 1.12  | 0.02 | 0.204 |
| ENSRNOG000000036267 | Mir341  | microRNA 341                                                | chr6  | 23.22   | 10.75   | 0.463 | -1.11 | 0.02 | 0.204 |
| ENSRNOG000000026055 | Neurod6 | neuronal differentiation 6                                  | chr4  | 209.83  | 471.69  | 2.248 | 1.17  | 0.02 | 0.204 |
| ENSRNOG000000021323 | Car13   | carbonic anhydrase 13                                       | chr2  | 41.87   | 90.18   | 2.154 | 1.11  | 0.03 | 0.214 |



|                     |            |                                                                          |       |        |        |       |       |      |       |
|---------------------|------------|--------------------------------------------------------------------------|-------|--------|--------|-------|-------|------|-------|
| N/A                 | Hist3h3    | histone cluster 3, H3                                                    | chr10 | 18.49  | 7.54   | 0.408 | -1.29 | 0.03 | 0.227 |
| ENSRNOG00000016275  | Ttr        | transthyretin                                                            | chr18 | 7.60   | 40.13  | 5.284 | 2.40  | 0.03 | 0.227 |
| ENSRNOG00000045989  | Hba-a1     | hemoglobin alpha; adult chain 1                                          | chr10 | 38.67  | 123.04 | 3.182 | 1.67  | 0.03 | 0.234 |
| ENSRNOG00000021513  | Rtn4rl2    | reticulon 4 receptor-like 2                                              | chr3  | 127.60 | 297.42 | 2.331 | 1.22  | 0.03 | 0.239 |
| ENSRNOG00000003620  | Fmo3       | flavin containing monooxygenase 3                                        | chr13 | 18.03  | 44.58  | 2.472 | 1.31  | 0.03 | 0.244 |
| ENSRNOG000000058827 | Six2       | SIX homeobox 2                                                           | chr6  | 15.94  | 42.57  | 2.671 | 1.42  | 0.03 | 0.245 |
| ENSRNOG00000003959  | Rgs18      | regulator of G-protein signaling 18                                      | chr13 | 10.77  | 24.83  | 2.306 | 1.21  | 0.03 | 0.245 |
| ENSRNOG00000017672  | Akr1c14    | aldo-keto reductase family 1; member C14                                 | chr17 | 85.10  | 197.81 | 2.324 | 1.22  | 0.03 | 0.249 |
| N/A                 | RT1-CE16   | RT1 class I; locus CE16                                                  | chr20 | 115.61 | 30.14  | 0.261 | -1.94 | 0.04 | 0.275 |
| ENSRNOG00000009434  | RGD1310507 | similar to RIKEN cDNA 1300017J02                                         | chr8  | 32.93  | 67.66  | 2.055 | 1.04  | 0.04 | 0.276 |
| ENSRNOG00000000167  | Alas2      | 5'-aminolevulinatase synthase 2                                          | chrX  | 88.95  | 214.99 | 2.417 | 1.27  | 0.04 | 0.284 |
| ENSRNOG00000012827  | Mlf1       | myeloid leukemia factor 1                                                | chr2  | 22.38  | 10.62  | 0.474 | -1.08 | 0.04 | 0.286 |
| ENSRNOG000000041300 | Mir874     | microRNA 874                                                             | chr17 | 4.51   | 0.58   | 0.129 | -2.96 | 0.05 | 0.302 |
| ENSRNOG00000015567  | Slc9a2     | solute carrier family 9; subfamily A (NHE2; cation proton antiporter 2); | chr9  | 254.20 | 536.38 | 2.110 | 1.08  | 0.05 | 0.303 |
| ENSRNOG000000037687 | Rspo2      | R-spondin 2                                                              | chr7  | 31.80  | 79.86  | 2.511 | 1.33  | 0.05 | 0.307 |

Supplementary Table S3. Differentially expressed gene list.

**Top Regulator Effect Networks**

| <b>ID</b>                                       | <b>Diseases &amp; Functions</b>        | <b>Consistency Score</b> |
|-------------------------------------------------|----------------------------------------|--------------------------|
| NGF,RAF1                                        | Concentration of dopamine,Coordination | 4.707                    |
| ASCL1, estrogen receptor, NCOA1<br>,NGF, Pkc(s) | Cell movement of neurons               | 2.345                    |
| EBI3,IL27,JAK1/2,Pkc(s),SNCA                    | Formation of brain,Movement Disorders  | 0.765                    |
| IFN alpha/beta, IFN Beta, Ifnar,<br>IFNL1       | Glucose metabolism disorder            | 0.655                    |
| APP                                             | Progressive neurological disorder      | 0.277                    |

Supplementary Table S4. Significant top regulator effect networks

qRT-PCR

|                      |                                |
|----------------------|--------------------------------|
| lc557-gapdh-f        | GAAGCTCATTTCTGGTATGACAATG      |
| lc558-gapdh-r        | GGTTTCTTACTCCTTGGAGGCCATG      |
| lc567-snca           | AAGACTATGAGCCTGAAGCCTAAG       |
| lc568-snca           | AGTGTGAAGCCACAACAATATCC        |
| LC631-rPpm1k-f       | GCTGTGACTGAGCAGGCAATTCAG       |
| LC631-rPpm1k-r       | CTGGAGGCAAAGCTTCTGCTGAA        |
| LC745 rNap1l5-f      | AAGTGAGCACAGCAGCTGACAGACTTG    |
| LC745 rNap1l5-r      | GAGTTCTGTCTTAGCTTGGGTGTTAAGGTG |
| LC760 rCHAT-f        | CCATTGACAACCATCTTCTGGCACTG     |
| LC760 rCHAT-r        | ATCTCCATGGTTGTGGGCACCTG        |
| LC761 rSlc5a7-f      | CCATTGGAGCCTCCACAGACTGG        |
| LC761 rSlc5a7-r      | GCAGCAGAAACAGCACCAAGCCC        |
| LC762 rSlc18a3-f     | GCCATAGCTGACATCTCCTATTCTGTGG   |
| LC762 rSlc18a3-r     | AGAAGAAGGACTGGTGCGTAGAGCAG     |
| LC763 rLhx 8-f       | CGGCGAGTCATACAGGTGTGGTTTC      |
| LC763 rLhx 8-r       | CTGGGGCACGTAGGCCGAATAAG        |
| LC764 rNgfr-f        | GCTTCAAGAGGTGGAACAGCTGC        |
| LC764 rNgfr-r        | TGCGTATGGGTCTGCTGGTCGTG        |
| LC765 rAdcy7 -f      | CTCCGAGTTGGCATAAACCACGG        |
| LC765 rAdcy7-r       | TTCCAAGCTCTCCGGTGTCTC          |
| LC766 rTacr1-f       | GTTGCCTCAACGACAGGTTCCGTC       |
| LC766 rTacr1-r       | TCCAGGCGGCTGACCTTGTACAC        |
| LC767 rTacr1-3UTR-f1 | GCATATTCAAGGCATGGCCTCTAGC      |
| LC768 rTacr1-3UTR-r1 | TGCCTTCTCCAGGTATGCCGATG        |
| LC854 rAqp1-f        | GACCAGAGCCTGGACAATCTGAAG       |
| LC855 rAqp1-r        | CCAGAGAGCTAAATGCAAGCCC         |

Adcyap1r1 promoter cloning

|                        |                                  |
|------------------------|----------------------------------|
| LC772 rAdcyap1r1Hind3R | TTACAAGCTTCGTCTGCTGTGCGCCACCCCG  |
| LC773 rAdcyap1r1KpnF   | ATAAGGTACCGGCTGTGAGGCAATCGGAAGAC |
| LC774 rAdcyap1r1_R     | CCTGGAGACCTCTAGGCTGAAGGAG        |
| LC775 rAdcyap1r1_F     | CCAGGGACTCACCTTCAGCCATAG         |

---

Supplementary Table S5. list of primer sequences.
